# Supplementary material for: High Fidelity of Mouse Models Mimicking Human Genetic Skeletal Disorders
Source: Front Endocrinol (Lausanne). 2020 Feb 4;10:934. doi: 10.3389/fendo.2019.00934 (PMC7010808; doi:10.3389/fendo.2019.00934)
Supplement: Supplementary file 1 [file Table_1.xlsx]

## Sheet: Sheet1
Supplemental Table 1: 2019 Nosology Genes with Heredity, Gene Function and Mouse Model Information
Human Ensembl ID	Mouse Ensembl ID	Human GENE Name	ISDS Edition	Human GENE ID	Gene Alias	Human Chromosome	Mouse GENE ID	Mouse Chromosome	Heredity	Gene Function	COMMENTS
ENSG00000157766	ENSMUSG00000030607	Aggrecan	2006	ACAN	AGC1	15	Acan	7	AD/AR	Matrix	Mouse Model
ENSG00000102575	ENSMUSG00000001348	Tatrate-Resistant Acid Phosphatase	2010	ACP5		19	Acp5	9	AR	Enzyme	Mouse Model
ENSG00000115170	ENSMUSG00000026836	Activin A Receptor Type 1	2006	ACVR1		2	Acvr1	2	AD	Signaling	Mouse Model
ENSG00000142303	ENSMUSG00000024299	ADAM Metallopeptidase with Thrombospondin Type 1 Motif 10	2006	ADAMTS10		19	Adamts10	17	AR	Enzyme	No Mouse Data
ENSG00000140470	ENSMUSG00000058145	ADAM Metallopeptidase with Thrombospondin Type 1 Motif 17	2015	ADAMTS17		15	Adamts17	7	AR	Enzyme	No Mouse Data
ENSG00000197859	ENSMUSG00000036040	ADAMTS-Like Protein 2	2010	ADAMTSL2		9	Adamtsl2	2	AR	Matrix	Mouse Model
ENSG00000144218	ENSMUSG00000037138	AF4/FMR2 Family Member 3	2019	AFF3	LAF4	2	Aff3	1	AD	Transcription	Mouse Model
ENSG00000038002	ENSMUSG00000031521	Aspartylglucosaminidase	2006	AGA		4	Aga	8	AR	Enzyme	Mouse
ENSG00000018510	ENSMUSG00000042410	Alkylglycerone Phosphate Synthase	2001	AGPS		2	Agps	2	AR	Enzyme	Mouse Model
ENSG00000156709	ENSMUSG00000036932	Apoptosis-Inducing Factor, Mitochondrion-Associated 1	2019	AIFM1		X	Aifm1	X	X	Transcription	Mouse
ENSG00000142208	ENSMUSG00000001729	AKT Serine/Threonine Kinase 1	2015	AKT1		14	Akt1	12	SP	Enzyme	Mouse Model
ENSG00000162551	ENSMUSG00000028766	Alkaline Phosphatase, Liver/Bone/Kidney	2001	ALPL		1	Alpl	4	AD/AR	Enzyme	Mouse Model
ENSG00000180318	ENSMUSG00000036602	Aristaless-Like 1	2015	ALX1		12	Alx1	10	AR	Transcription	Mouse Model
ENSG00000156150	ENSMUSG00000014603	Aristaless-Like 3	2010	ALX3		1	Alx3	3	AR	Transcription	Mouse Model
ENSG00000052850	ENSMUSG00000040310	Aristaless-Like 4	2001	ALX4		11	Alx4	2	AD/AR	Transcription	Mouse Model
ENSG00000184675	ENSMUSG00000050332	APC Membrane Recruitment Protein 1	2010	AMER1	WTX	X	Amer1	X	AR	Scaffolding	Mouse Model
ENSG00000154122	ENSMUSG00000022265	Progressive Ankylosis (Pyrophosphate Transporter)	2001	ANKH		5	Ank	15	AD	Transporter	Mouse Model
ENSG00000171714	ENSMUSG00000055489	Anoctamin 5	2006	ANO5	TMEM16E	11	Ano5	7	AD	Transporter	Mouse
ENSG00000163297	ENSMUSG00000029338	Anthrax Toxin Receptor 2	2010	ANTXR2		4	Antxr2	5	AR	Signaling	Mouse Model
ENSG00000115266	ENSMUSG00000020135	APC Regulator of WNT Signaling Pathway 2	2019	APC2		19	Apc2	10	AR	Scaffolding	Mouse Model
ENSG00000031081	ENSMUSG00000022799	Rho GTPase Activating Protein 31	2015	ARHGAP31		3	Arhgap31	16	AD	Enzyme	No Mouse Data
ENSG00000049618	ENSMUSG00000069729	AT-Rich Interaction Domain 1B	2019	ARID1B		6	Arid1b	17	AD	Scaffolding	No Mouse Data
ENSG00000113273	ENSMUSG00000042082	Arylsulfatase B	2006	ARSB		5	Arsb	13	AR	Enzyme	Mouse Model
ENSG00000157399	No Mouse Gene	Arylsulfatase E	2001	ARSE		X	No Mouse Gene		X	Enzyme	No Mouse Gene
ENSG00000185344	ENSMUSG00000038023	ATPase, H+ Transporting, Lysosomal, V0 Subunit A2	2010	ATP6V0A2		12	Atp6v0a2	5	AR	Enzyme	No Mouse Data
ENSG00000175054	ENSMUSG00000032409	ATR Serine/Threonine Kinase	2019	ATR		3	Atr	9	AR	Enzyme	Mouse Model
ENSG00000176022	ENSMUSG00000050796	Beta-1,3-Galactosyltransferase Polypeptide 6	2015	B3GALT6		1	B3galt6	4	AR	Enzyme	No Mouse Data
ENSG00000149541	ENSMUSG00000071649	Beta-1,3-Glucuronyltransferase 3	2019	B3GAT3		11	B3gat3	9	AR	Enzyme	No Mouse Data
ENSG00000027847	ENSMUSG00000021504	Xylosylprotein Beta-1,4-Galactosyltransferase, Polypeptide 7 = 8	2010	B4GALT7		5	B4galt7	13	AR	Enzyme	No Mouse Data
ENSG00000182492	ENSMUSG00000031375	Biglycan	2019	BGN		X	Bgn	X	X	Matrix	Mouse Model
ENSG00000205899	ENSMUSG00000044243	Basic Helix-Loop-Helix Family, Member A9	2015	BHLHA9		17	Bhlha9	11	AD	Transcription	Mouse Model
ENSG00000168487	ENSMUSG00000022098	Bone Morphogenetic Protein 1	2015	BMP1		8	Bmp1	14	AR	Signaling	Mouse Model
ENSG00000125845	ENSMUSG00000027358	Bone Morphogenetic Protein 2	2010	BMP2		20	Bmp2	2	AD	Signaling	Mouse Model
ENSG00000164619	ENSMUSG00000031963	BMP-Binding Endothelial Regulator	2010	BMPER		7	Bmper	9	AR	Signaling	Mouse Model
ENSG00000138696	ENSMUSG00000052430	Bone Morphogenetic Protein Receptor, Type 1B	2006	BMPR1B		4	Bmpr1b	3	AD/AR	Signaling	Mouse Model
ENSG00000168014	ENSMUSG00000047248	C2 Calcium Dependent Domain Containing 3	2019	C2CD3		11	C2cd3	7	AR	Ciliopathy	Mouse Model
ENSG00000104267	ENSMUSG00000027562	Carbonic Anhydrase II	2001	CA2		8	Car2	3	AR	Enzyme	Mouse Model
ENSG00000171302	ENSMUSG00000025575	Calcium Activated Nucleotidase 1	2010	CANT1		17	Cant1	11	AR	Enzyme	Mouse Model
ENSG00000036828	ENSMUSG00000051980	Calcium Sensing Receptor	2001	CASR		3	Casr	16	AD/AR	Signaling	Mouse Model
ENSG00000048342	ENSMUSG00000039765	Coiled-Coil and C2 Domain Containing 2A	2010	CC2D2A		4	Cc2d2a	5	AR	Ciliopathy	Mouse Model
ENSG00000169515	ENSMUSG00000041117	Coiled-Coil Domain-Containing Protein 8	2015	CCDC8		19	Ccdc8	7	AR	Scaffolding	No Mouse Data
ENSG00000112761	ENSMUSG00000062074	Cellular Communication Network Factor 6	2001	CCN6	WISP3	6	Ccn6	10	AR	Signaling	Model Failure
ENSG00000147382	ENSMUSG00000049489	Cyclin Q	2010	CCNQ	FAM58A	X	Ccnq	6	X	Scaffolding	Mouse
ENSG00000093009	ENSMUSG00000000028	Cell Division Cycle 45	2019	CDC45		22	Cdc45	16	AR	Scaffolding	Mouse
ENSG00000094804	ENSMUSG00000017499	Cell Division Cycle 6	2015	CDC6		17	Cdc6	11	AR	Scaffolding	No Mouse Data
ENSG00000134371	ENSMUSG00000026361	Cell Division Cycle 73	2019	CDC73		1	Cdc73	1	AD	Scaffolding	Mouse Model
ENSG00000062038	ENSMUSG00000061048	Cadherin 3	2006	CDH3		16	Cdh3	8	AR	Scaffolding	Mouse
ENSG00000129757	ENSMUSG00000037664	Cyclin Dependent Kinase Inhibitor 1C	2015	CDKN1C		11	Cdkn1c	7	AD	Enzyme	Mouse Model
ENSG00000167513	ENSMUSG00000006585	Chromatin Licensing and DNA Replication Factor 1	2015	CDT1		16	Cdt1	8	AR	Scaffolding	No Mouse Data
ENSG00000138778	ENSMUSG00000045328	Centromere Protein E	2019	CENPE		4	Cenpe	5	AR	Scaffolding	No Mouse Data
ENSG00000168944	ENSMUSG00000048799	Centrosomal Protein 120	2019	CEP120		5	Cep120	18	AR	Ciliopathy	No Mouse Data
ENSG00000103995	ENSMUSG00000068394	Centrosomal Protein 152	2019	CEP152		15	Cep152	2	AR	Scaffolding	No Mouse Data
ENSG00000198707	ENSMUSG00000019971	Centrosomal Protein 290	2010	CEP290		12	Cep290	10	AR	Ciliopathy	Mouse
ENSG00000160226	ENSMUSG00000020284	Cilia and Fagella Associated Protein 410 (C21ORF2)	2019	CFAP410		21	Cfap410	10	AR	Ciliopathy	No Mouse Data
ENSG00000169105	ENSMUSG00000074916	Carbohydrate Sulfotransferase 14; Dermatan 4-Sulfotransferase	2010	CHST14		15	Chst14	2	AR	Enzyme	Mouse
ENSG00000122863	ENSMUSG00000057337	Carbohydrate Sulfotransferase 3; Chondroitin 6-Sulfotransferase	2006	CHST3		10	Chst3	10	AR	Enzyme	Mouse
ENSG00000131873	ENSMUSG00000032640	Chondroitin Sulfate Synthase 1	2015	CHSY1		15	Chsy1	7	AR	Enzyme	Mouse Model
ENSG00000169607	ENSMUSG00000048327	Cytoskeleton Associated Protein 2-Like	2015	CKAP2L		2	Ckap2l	2	AR	Scaffolding	Mouse
ENSG00000171365	ENSMUSG00000004317	Chloride Voltage-Gated Channel 5	2010	ClCN5		X	Clcn5	X	X	Transporter	Mouse Model
ENSG00000103249	ENSMUSG00000036636	Chloride Voltage-Gated Channel 7	2001	CLCN7		15	Clcn7	17	AD/AR	Transporter	Mouse Model
ENSG00000166685	ENSMUSG00000018661	Component of Oligomeric Golgi Complex 1	2006	COG1		17	Cog1	11	AR	Scaffolding	No Mouse Data
ENSG00000103051	ENSMUSG00000031753	Component of Oligomeric Golgi Complex 4	2019	COG4		16	Cog4	8	AD	Scaffolding	No Mouse Data
ENSG00000108821	ENSMUSG00000001506	Collagen Type I Alpha 1 Chain	2001	COL1A1		17	Col1a1	11	AD	Matrix	Mouse Model
ENSG00000164692	ENSMUSG00000029661	Collagen Type I Alpha 2 Chain	2001	COL1A2		7	Col1a2	6	AD	Matrix	Mouse Model
ENSG00000139219	ENSMUSG00000022483	Collagen Type II Alpha 1 Chain	2001	COL2A1		12	Col2a1	15	AD	Matrix	Mouse Model
ENSG00000112280	ENSMUSG00000026147	Collagen Type IX Alpha 1 Chain	2001	COL9A1		6	Col9a1	1	AD/AR	Matrix	Mouse Model
ENSG00000049089	ENSMUSG00000028626	Collagen Type IX Alpha 2 Chain	2001	COL9A2		1	Col9a2	4	AD/AR	Matrix	Mouse
ENSG00000092758	ENSMUSG00000027570	Collagen Type IX Alpha 3 Chain	2001	COL9A3		20	Col9a3	2	AD/AR	Matrix	No Mouse Data
ENSG00000123500	ENSMUSG00000039462	Collagen Type X Alpha 1 Chain	2006	COL10A1		6	Col10a1	10	AD	Matrix	Mouse Model
ENSG00000060718	ENSMUSG00000027966	Collagen Type XI Alpha 1 Chain	2006	COL11A1		1	Col11a1	3	AD/AR	Matrix	Mouse Model
ENSG00000204248	ENSMUSG00000024330	Collagen Type XI Alpha 2 Chain	2006	COL11A2		6	Col11a2	17	AD/AR	Matrix	Mouse Model
ENSG00000196739	ENSMUSG00000045672	Collagen Type XXVII Alpha 1 Chain	2019	COL27A1		9	Col27a1	4	AR	Matrix	Mouse Model
ENSG00000105664	ENSMUSG00000031849	Cartilage Oligomeric Matrix Protein	2001	COMP		19	Comp	8	AD	Matrix	Mouse Model
ENSG00000157613	ENSMUSG00000027230	cAMP Responsive Element Binding Protein 3 Like	2015	CREB3L1		11	Creb3l1	2	AR	Transcription	Mouse Model
ENSG00000005339	ENSMUSG00000022521	CREB Binding Protein	2006	CREBBP		16	Crebbp	16	AD	Transcription	Mouse Model
ENSG00000119878	ENSMUSG00000024146	CXXC Repeat Containing Interactor of PDZ3 Domain	2019	CRIPT		2	Cript	17	AR	Scaffolding	No Mouse Data
ENSG00000170275	ENSMUSG00000032431	Cartilage Associated Protein	2006	CRTAP		3	Crtap	9	AR	Scaffolding	Mouse Model
ENSG00000182578	ENSMUSG00000024621	Colony Stimulating Factor 1 Receptor	2019	CSF1R		5	Csf1r	18	AR	Signaling	Mouse Model
ENSG00000147408	ENSMUSG00000036356	Chondroitin Sulfate N-Acetylgalactosaminyltransferase	2019	CSGALNACT1		8	Csgalnact1	8	AR	Enzyme	Mouse Model
ENSG00000064601	ENSMUSG00000017760	Cathepsin A	2006	CTSA	PPGB	20	Ctsa	2	AR	Enzyme	Mouse
ENSG00000143387	ENSMUSG00000028111	Cathepsin K	2001	CTSK		1	Ctsk	3	AR	Enzyme	Mouse Model
ENSG00000044090	ENSMUSG00000038545	Ubiquitin Ligase Culin 7	2006	CUL7		6	Cul7	17	AR	Enzyme	Mouse
ENSG00000111012	ENSMUSG00000006724	Cytochrome P450 Family 27 Subfamily B Member 1	2001	CYP27B1		12	Cyp27b1	10	AR	Enzyme	Mouse Model
ENSG00000186104	ENSMUSG00000030670	Cytochrome P450 Family 2 Subfamily R Member 1	2019	CYP2R1		11	Cyp2r1	7	AR	Enzyme	Model Failure
ENSG00000162733	ENSMUSG00000026674	Discoidin Domain Receptor 2	2010	DDR2		1	Ddr2	1	AR	Signaling	Mouse Model
ENSG00000198171	ENSMUSG00000068290	DDRGK Domain Containing 1	2019	DDRGK1		20	Ddrgk1	2	AR	Scaffolding	Mouse Model
ENSG00000107201	ENSMUSG00000040296	DExD/H-Box Helicase 58	2019	DDX58		9	Ddx58	4	AR	Enzyme	Mouse
ENSG00000116133	ENSMUSG00000034926	3-Beta-Hydroxysterol Delta-24-Reductase	2006	DHCR24		1	Dhcr24	4	AR	Enzyme	Mouse
ENSG00000102967	ENSMUSG00000031730	Dihydroorotate Dehydrogenase	2010	DHODH		16	Dhodh	8	AR	Enzyme	No Mouse Data
ENSG00000090932	ENSMUSG00000003436	Delta Like Canonical Notch Ligand 3	2001	DLL3		19	Dll3	7	AR	Signaling	Mouse Model
ENSG00000128917	ENSMUSG00000027314	Delta Like Canonical Notch Ligand 4	2019	DLL4		15	Dll4	2	AD	Signaling	Mouse
ENSG00000064195	ENSMUSG00000001510	Distal-Less Homeobox 3	2001	DLX3		17	Dlx3	11	AD	Transcription	Mouse Model
ENSG00000105880	ENSMUSG00000029755	Distal-Less Homeobox 5	2015	DLX5		7	Dlx5	6	AD	Transcription	Mouse Model
ENSG00000006377	ENSMUSG00000029754	Distal-Less Homeobox 6	2015	DLX6		7	Dlx6	6	AD	Transcription	Mouse Model
ENSG00000152592	ENSMUSG00000029307	Dentin Matrix Acidic Phosphoprotein 1	2010	DMP1		4	Dmp1	5	AR	Matrix	Mouse Model
ENSG00000138346	ENSMUSG00000036875	DNA Replication Helicase/Nuclease 2	2019	DNA2		10	Dna2	10	AR	Enzyme	Mouse
ENSG00000168724	ENSMUSG00000044224	DnaJ Heat Shock Protein Family (Hsp40) Member C21	2019	DNAJC21		5	Dnajc21	15	AR	Scaffolding	No Mouse Data
ENSG00000119772	ENSMUSG00000020661	DNA Methyltransferase 3	2019	DNMT3A		2	Dnmt3a	12	AD	Enzyme	Mouse
ENSG00000130158	ENSMUSG00000032198	Dedicator of Cytokinesis 6	2015	DOCK6		19	Dock6	9	AR	Scaffolding	No Mouse Data
ENSG00000111817	ENSMUSG00000039497	Dermatan Sulfate Epimerase	2019	DSE		6	Dse	10	AR	Enzyme	Mouse
ENSG00000107404	ENSMUSG00000029071	Dishevelled Segment Polarity Protein 1	2015	DVL1		1	Dvl1	4	AD	Scaffolding	Mouse
ENSG00000161202	ENSMUSG00000003233	Dishevelled Segment Polarity Protein 3	2019	DVL3		3	Dvl3	16	AD	Scaffolding	Mouse
ENSG00000141627	ENSMUSG00000035765	Dymeclin	2006	DYM		18	Dym	18	AR	Scaffolding	Mouse Model
ENSG00000187240	ENSMUSG00000047193	Dynein Cytoplasmic 2 Heavy Chain 1	2010	DYNC2H1		11	Dync2h1	9	AR	Ciliopathy	No Mouse Data
ENSG00000138036	ENSMUSG00000024253	Dynein Cytoplasmic 2 Light Intermediate Chain 1	2019	DYNC2LI1		2	Dync2li1	17	AR	Ciliopathy	No Mouse Data
ENSG00000147155	ENSMUSG00000031168	Emopamil Binding Protein (Sterol Isomerase)	2006	EBP		X	Ebp	X	X	Transporter	Mouse Model
ENSG00000078401	ENSMUSG00000021367	Endothelin 1	2019	EDN1		6	Edn1	13	AR	Signaling	Mouse Model
ENSG00000151617	ENSMUSG00000031616	Endothelian Receptor, Type A	2019	EDNRA		4	Ednra	8	AD	Signaling	Mouse Model
ENSG00000074266	ENSMUSG00000030619	Embryonic Ectoderm Development	2019	EED		11	Eed	7	AD	Scaffolding	Mouse
ENSG00000140598	ENSMUSG00000038563	Elongation Factor Like GTPase 1	2019	EFL1		15	Efl1	7	AR	Enzyme	Mouse
ENSG00000090776	ENSMUSG00000031217	Ephrin B1	2006	EFNB1		X	Efnb1	X	X	Enzyme	Mouse Model
ENSG00000108883	ENSMUSG00000020929	Elongation Factor tu GTP-Binding Domain-Containing 2	2015	EFTUD2		11	Eftud2	9	AD	Enzyme	No Mouse Data
ENSG00000172071	ENSMUSG00000031668	Translation Initiation Factor 2 Alpha Kinase-3	2001	EIF2AK3	PERK	2	Eif2ak3	6	AR	Enzyme	Mouse Model
ENSG00000141543	ENSMUSG00000025580	Eukaryotic Translation Initiation Factor 4A3	2019	EIF4A3		17	Eif4a3	11	AR	Enzyme	Mouse Model
ENSG00000197594	ENSMUSG00000037370	Eectonucleotide Pyrophosphatase/Phosphodiesterase 1	2010	ENPP1		6	Enpp1	10	AR	Enzyme	Mouse Model
ENSG00000163378	ENSMUSG00000035245	EGF-Domain-Specific O-Linked N-Acetylglucosamine (O-GlcNAc) Transferase	2015	EOGT		3	Egot	6	AR	Enzyme	Mouse
ENSG00000100393	ENSMUSG00000055024	E1A Binding Protein p300	2010	EP300		22	Ep300	15	AD	Enzyme	Mouse
ENSG00000105722	ENSMUSG00000040857	ETS2 Repressor Factor	2015	ERF		19	Erf	7	AD	Transcription	Mouse Model
ENSG00000171320	ENSMUSG00000022034	Establishment of Sister Chromatid Cohesion N-Acetyltransferase 2	2006	ESCO2		8	Esco2	14	AR	Enzyme	Mouse
ENSG00000072840	ENSMUSG00000029122	EvC Ciliary Complex Subunit 1	2001	EVC	EVC1	4	Evc	5	AD/AR	Ciliopathy	Mouse Model
ENSG00000173040	ENSMUSG00000050248	EvC Ciliary Complex Subunit 2	2006	EVC2		4	Evc2	5	AD/AR	Ciliopathy	Mouse Model
ENSG00000144036	ENSMUSG00000033769	Exocyst Complex Component 6B	2019	EXOC6B		2	Exoc6b	6	AR	Scaffolding	No Mouse Data
ENSG00000182197	ENSMUSG00000061731	Exostosin Glycosyltransferase 1	2001	EXT1		8	Ext1	15	AD	Enzyme	Mouse Model
ENSG00000151348	ENSMUSG00000027198	Exostosin Glycosyltransferase 2	2001	EXT2		11	Ext2	2	AD	Enzyme	Mouse Model
ENSG00000012232	ENSMUSG00000021978	Exostosin Like Glycosltransferase 3	2019	EXTL3		8	Extl3	14	AR	Enzyme	No Mouse Data
ENSG00000106462	ENSMUSG00000029687	Enhancer of Zeste 2 Polycomb Repressive Complex 2 Subunit	2015	EZH2		7	Ezh2	6	SP/AD	Scaffolding	Mouse Model
ENSG00000116199	ENSMUSG00000033557	FAM20B Glycosaminoglycan Xylosylkinase	2019	FAM20B		1	Fam20b	1	AR	Enzyme	Mouse Model
ENSG00000177706	ENSMUSG00000025854	FAM20C, Golgi Associated Secretory Pathway Kinase	2010	FAM20C		7	Fam20c	5	AR	Enzyme	Mouse Model
ENSG00000166801	ENSMUSG00000024691	Family with Sequence Similarity 111 Member A	2015	FAM111A		11	Fam111a	19	AD	Scaffolding	No Mouse Data
ENSG00000197601	ENSMUSG00000030759	Fatty Acyl-CoA Reductase 1	2019	FAR1		11	Far1	7	AR	Enzyme	No Mouse Data
ENSG00000077942	ENSMUSG00000006369	Fibulin 1	2006	FBLN1		22	Fbln1	15	AD	Matrix	Mouse
ENSG00000166147	ENSMUSG00000027204	Fibrillin 1	2006	FBN1		15	Fbn1	2	AD	Matrix	Mouse Model
ENSG00000138829	ENSMUSG00000024598	Fibrillin 2	2010	FBN2		5	Fbn2	18	AD	Matrix	Mouse Model
ENSG00000149781	ENSMUSG00000024965	Fermitin Family Member 3	2010	FERMT3	KIND3	11	Fermt3	19	AR	Scaffolding	Mouse
ENSG00000102678	ENSMUSG00000021974	Fibroblast Growth Factor 9	2010	FGF9		13	Fgf9	14	AD	Signaling	Mouse Model
ENSG00000070193	ENSMUSG00000021732	Fibroblast Growth Factor 10	2006	FGF10		5	Fgf10	13	AD	Signaling	Mouse
ENSG00000118972	ENSMUSG00000000182	Fibroblast Growth Factor 23	2001	FGF23		12	Fgf23	6	AD	Signaling	Mouse Model
ENSG00000077782	ENSMUSG00000031565	Fibroblast Growth Factor Receptor 1	2001	FGFR1		8	Fgfr1	8	AD	Signaling	Mouse Model
ENSG00000066468	ENSMUSG00000030849	Fibroblast Growth Factor Receptor 2	2001	FGFR2		10	Fgfr2	7	AD	Signaling	Mouse Model
ENSG00000068078	ENSMUSG00000054252	Fibroblast Growth Factor Receptor 3	2001	FGFR3		4	Fgfr3	5	AD	Signaling	Mouse Model
ENSG00000112367	ENSMUSG00000038417	FIG4 Phosphoinositide Phosphatase	2015	FIG4		6	Fig4	10	AR	Enzyme	Mouse Model
ENSG00000141756	ENSMUSG00000001555	FK506 Binding Protein 10	2010	FKBP10		17	Fkbp10	11	AR	Scaffolding	Mouse Model
ENSG00000106080	ENSMUSG00000038074	FKBP Prolyl Isomerase 14	2019	FKBP14		7	Fkbp14	6	AR	Enzyme	No Mouse Data
ENSG00000196924	ENSMUSG00000031328	Filamin A	2006	FLNA		X	Flna	X	X	Scaffolding	Model Failure
ENSG00000136068	ENSMUSG00000025278	Filamin B	2006	FLNB		3	Flnb	14	SP	Scaffolding	Mouse Model
ENSG00000248905	ENSMUSG00000044042	Formin 1	2010	FMN1		15	Fmn1	2	AR	Scaffolding	Mouse Model
ENSG00000115414	ENSMUSG00000026193	Fibronectin 1	2019	FN1		2	Fn1	1	AD	Matrix	Mouse
ENSG00000179163	ENSMUSG00000028673	Alpha-Fucosidase	2006	FUCA1		1	Fuca1	5	AR	Enzyme	Mouse
ENSG00000010361	ENSMUSG00000011658	Fuzzy Planar Cell Polarity Protein	2019	FUZ		19	Fuz	7	AR	Ciliopathy	Mouse Model
ENSG00000180340	ENSMUSG00000050288	FRIZZLED2 WNT Receptor	2015	FZD2		17	Fzd2	11	AD	Signaling	Mouse Model
ENSG00000141012	ENSMUSG00000015027	Galactosamine-6-Sulfate Sulfatase	2006	GALNS		16	Galns	8	AR	Enzyme	Model Failure
ENSG00000115339	ENSMUSG00000026994	Polypeptide N-Acetylgalactosaminyltransferase 3	2010	GALNT3		2	Galnt3	2	AR	Enzyme	Mouse Model
ENSG00000124827	ENSMUSG00000021362	Glial Cells Missing Homolog 2	2019	GCM2		6	Gcm2	13	AD	Transcription	Mouse Model
ENSG00000184344	ENSMUSG00000030117	Growth and Differentiation Factor 3	2015	GDF3		12	Gdf3	6	AD	Signaling	Mouse
ENSG00000125965	ENSMUSG00000038259	Growth and Differentiation Factor 5	2001	GDF5		20	Gdf5	2	AD/AR	Signaling	Mouse Model
ENSG00000156466	ENSMUSG00000051279	Growth and Differentiation Factor 6	2010	GDF6		8	Gdf6	4	AD	Signaling	Mouse Model
ENSG00000152661	ENSMUSG00000055691	Gap Junction Protein Alpha 1 (Connexion 43)	2006	GJA1	Connexin 43	6	Gja1	10	AD/AR	Scaffolding	Mouse Model
ENSG00000170266	ENSMUSG00000045594	Galactosidase, Beta 1	2006	GLB1		3	Glb1	9	AR	Enzyme	Mouse
ENSG00000106571	ENSMUSG00000021318	GLI Family Zinc Finger 3	2001	GLI3		7	Gli3	13	AD	Transcription	Mouse Model
ENSG00000112312	ENSMUSG00000006715	Geminin DNA Replication Inhibitor	2019	GMNN		6	Gmnn	13	AD	Scaffolding	No Mouse Data
ENSG00000065135	ENSMUSG00000000001	G Protein Subunit Alpha I3	2019	GNAI3		1	Gnai3	3	AD	Signaling	Model Failure
ENSG00000087460	ENSMUSG00000027523	GNAS Complex Locus	2001	GNAS		20	Gnas	2	SP	Signaling	Mouse Model
ENSG00000116906	ENSMUSG00000031985	Glyceronephosphate O-Acyltransferase	2001	GNPAT	DHAPAT	1	Gnpat	8	AR	Enzyme	Mouse
ENSG00000111670	ENSMUSG00000035311	N-Acetylglucosamine-1-Phosphate Transferase Alpha and Beta Subunits	2006	GNPTAB		12	Gnptab	10	AR	Enzyme	Mouse Model
ENSG00000090581	ENSMUSG00000035521	N-Acetylglucosamine-1-Phosphate Transferase Gamma Subunit	2010	GNPTG		16	Gnptg	17	AR	Enzyme	Mouse Model
ENSG00000135677	ENSMUSG00000034707	N-Acetylglucosamine 6-Sulfatase	2006	GNS		12	Gns	10	AR	Enzyme	Mouse
ENSG00000120370	ENSMUSG00000040124	Golgin, RAB6 Interacting	2010	GORAB		1	Gorab	1	AR	Scaffolding	Mouse Model
ENSG00000183098	ENSMUSG00000058571	Glypican 6	2010	GPC6		13	Gpc6	14	AR	Scaffolding	Mouse
ENSG00000167468	ENSMUSG00000075706	Glutathione Peroxidase 4	2015	GPX4		19	Gpx4	10	AR	Enzyme	Mouse
ENSG00000166923	ENSMUSG00000074934	Gremlin 1, DAN Family BMP Antagonist	2010	GREM1		15	Grem1	2	SP	Signaling	Mouse Model
ENSG00000133937	ENSMUSG00000021095	Goosecoid Homeobox	2019	GSC		14	Gsc	12	AR	Transcription	Mouse Model
ENSG00000169919	ENSMUSG00000025534	Beta-Glucuronidase	2010	GUSB		7	Gusb	5	AR	Enzyme	Mouse Model
ENSG00000125812	ENSMUSG00000027439	GDNF Inducible Zinc Finger Protein 1	2019	GZF1		20	Gzf1	2	AR	Transcription	No Mouse Data
ENSG00000162882	ENSMUSG00000000673	3-Hydroxyanthranilate 3,4-Dioxygenase	2019	HAAO		2	Haao	17	AR	Enzyme	Mouse Model
ENSG00000068024	ENSMUSG00000026313	Histone Deacetylase 4	2010	HDAC4		2	Hdac4	1	AD	Enzyme	Mouse Model
ENSG00000147099	ENSMUSG00000067567	Histone Deacetylase 8	2015	HDAC8		X	Hdac8	X	X	Enzyme	Mouse Model
ENSG00000179111	ENSMUSG00000023781	Hes Family bHLH Transcription Factor 7	2010	HES7		17	Hes7	11	AR	Transcription	Mouse Model
ENSG00000165102	ENSMUSG00000037260	Heparan-Alpha-Glucosaminide N-Acetyltransferase	2010	HGSNAT		8	Hgsnat	8	AR	Enzyme	Mouse
ENSG00000005073	ENSMUSG00000038210	Homeobox A11	2006	HOXA11		7	Hoxa11	6	AD	Transcription	Mouse Model
ENSG00000106031	ENSMUSG00000038203	Homeobox A13	2006	HOXA13		7	Hoxa13	6	AD	Transcription	Mouse Model
ENSG00000128714	ENSMUSG00000001819	Homeobox D13	2001	HOXD13		2	Hoxd13	2	AD	Transcription	Mouse Model
ENSG00000164120	ENSMUSG00000031613	15-Prostaglandin Dehydrogenase	2010	HPGD		4	Hpgd	8	AR	Enzyme	Mouse
ENSG00000174775	ENSMUSG00000025499	HRas Proto-Oncogene, GTPase	2019	HRAS		11	Hras	7	SP	Enzyme	Mouse
ENSG00000113013	ENSMUSG00000024359	Heat Shock Protein Family A (Hsp70) Member 9	2019	HSPA9		5	Hspa9	18	AR	Scaffolding	No Mouse Data
ENSG00000142798	ENSMUSG00000028763	Heparan Sulfate Proteoglycan 2 (Perlecan)	2006	HSPG2		1	Hspg2	4	AR	Matrix	Mouse Model
ENSG00000067704	ENSMUSG00000026618	Isoleucyl-tRNA Synthetase 2, Mitochondrial	2019	IARS2		1	Iars2	1	AR	Enzyme	No Mouse Data
ENSG00000112144	ENSMUSG00000009828	Intestinal Cell Kinase	2010	ICK		6	Ick	9	AR	Enzyme	Mouse Model
ENSG00000172201	ENSMUSG00000021379	Inhibitor of DNA Binding 4, HLH Protein	2019	ID4		6	Id4	13	AD	Scaffolding	Mouse Model
ENSG00000138413	ENSMUSG00000025950	Isocitrate Dehydrogenase (NADP(+)) 1	2015	IDH1		2	Idh1	1	SP	Enzyme	Mouse Model
ENSG00000182054	ENSMUSG00000030541	Isocitrate Dehydrogenase (NADP(+)) 2	2015	IDH2		15	Idh2	7	SP	Enzyme	Mouse
ENSG00000010404	ENSMUSG00000035847	Iduronate-2-Sulfatase	2006	IDS		X	Ids	X	X	Enzyme	Mouse Model
ENSG00000127415	ENSMUSG00000033540	Alpha-1-Iduronidase	2006	IDUA	IDA	4	Idua	5	AR	Enzyme	Mouse Model
ENSG00000115267	ENSMUSG00000026896	Interferon Induced with Helicase C Domain 1	2019	IFIH1		2	Ifih1	2	AD	Scaffolding	Mouse
ENSG00000206013	ENSMUSG00000025489	Interferon-Inducible Transmembrane Protein 5	2015	IFITM5	BRIL	11	Ifitm5	7	AD	Scaffolding	Mouse Model
ENSG00000119650	ENSMUSG00000007867	Intraflagellar Transport 43	2015	IFT43		14	Ift43	12	AR	Ciliopathy	No Mouse Data
ENSG00000101052	ENSMUSG00000017858	Intraflagellar Transport 52	2019	IFT52		20	Ift52	2	AR	Ciliopathy	No Mouse Data
ENSG00000068885	ENSMUSG00000027778	Intraflagellar Transport 80	2010	IFT80		3	Ift80	3	AR	Ciliopathy	Mouse Model
ENSG00000122970	ENSMUSG00000029469	Intraflagellar Transport 81	2019	IFT81		12	Ift81	5	AR	Ciliopathy	No Mouse Data
ENSG00000163913	ENSMUSG00000030323	Intraflagellar Transport 122	2010	IFT122		3	Ift122	6	AR	Ciliopathy	Mouse
ENSG00000187535	ENSMUSG00000024169	Intraflagellar Transport 140	2015	IFT140		16	Ift140	17	AR	Ciliopathy	Mouse Model
ENSG00000138002	ENSMUSG00000038564	Intraflagellar Transport 172	2015	IFT172		2	Ift172	5	AR	Ciliopathy	Mouse
ENSG00000163501	ENSMUSG00000006538	Indian Hedgehog	2001	IHH		2	Ihh	1	AD/AR	Signaling	Mouse Model
ENSG00000073009	ENSMUSG00000004221	Inhibitor of Nuclear Factor Kappa B Kinase Subunit Gamma (NEMO)	2001	IKBKG	NEMO	X	Ikbkg	X	X	Scaffolding	Mouse Model
ENSG00000136689	ENSMUSG00000026981	Interleukin 1 Receptor Antagonist	2010	IL1RN		2	Il1rn	2	AR	Signaling	Mouse
ENSG00000104331	ENSMUSG00000066324	Golgi-Resident Nucleotide Phosphatase, gPAPP	2015	IMPAD1		8	Impad1	4	AR	Enzyme	Mouse Model
ENSG00000165458	ENSMUSG00000032737	SHIP2 - Src Homology 2 Domain-Containing Inositol Phosphatase 2)	2015	INPPL1		11	Inppl1	7	AR	Enzyme	Mouse
ENSG00000164066	ENSMUSG00000060798	Inturned Planar Cell Polarity Protein	2019	INTU		4	Intu	3	AR	Ciliopathy	Mouse Model
ENSG00000156650	ENSMUSG00000021767	Lysine Acetyltransferase 6B	2015	KAT6B	MYST4	10	Kat6b	14	AD	Enzyme	Mouse Model
ENSG00000123700	ENSMUSG00000041695	Potassium Inwardly Rectifying Channel Subfamily J Member 2	2019	KCNJ2		17	Kcnj2	11	AD	Transporter	Mouse
ENSG00000100578	ENSMUSG00000034601	KIAA0586	2019	KIAA0586	TALPID3	14	2700049A03Rik	12	AR	Ciliopathy	Mouse Model
ENSG00000198920	ENSMUSG00000020807	KIAA0753	2019	KIAA0753		17	RIKEN 4933427D14	11	AR	Ciliopathy	Mouse
ENSG00000079616	ENSMUSG00000030677	Kinesin Family Member 22	2015	KIF22		16	Kif22	7	AD	Ciliopathy	No Mouse Data
ENSG00000166813	ENSMUSG00000050382	Kinesin Family Member 7	2015	KIF7		15	Kif7	7	AR	Ciliopathy	Mouse Model
ENSG00000133116	ENSMUSG00000058488	Klotho	2019	KL	Klotho	13	Kl	5	AR	Signaling	Mouse Model
ENSG00000115919	ENSMUSG00000026866	Kynureninase	2019	KYNU		2	Kynu	2	AR	Enzyme	Mouse Model
ENSG00000143815	ENSMUSG00000004880	Lamin B Receptor, 3-Beta-Hydroxysterol Delta (14)-Reductase	2006	LBR		1	Lbr	1	AR	Enzyme	Mouse Model
ENSG00000174106	ENSMUSG00000048661	LEM Domain-Containing 3	2006	LEMD3		12	Lemd3	10	AD	Scaffolding	Model Failure
ENSG00000106003	ENSMUSG00000029570	LFNG O-Fucosylpeptide 3-Beta-N-Acetylglucosaminyltransferase	2006	LFNG		7	Lfng	5	AR	Enzyme	Mouse Model
ENSG00000113594	ENSMUSG00000054263	Leukemia Inhibitory Factor Receptor	2006	LIFR		5	Lifr	15	AR	Signaling	Mouse Model
ENSG00000105983	ENSMUSG00000010721	Limb Development Membrane Protein 1	2001	LMBR1		7	Lmbr1	5	AR	Signaling	Mouse Model
ENSG00000160789	ENSMUSG00000028063	Lamin A/C	2006	LMNA		1	Lmna	3	AD	Scaffolding	Mouse Model
ENSG00000136944	ENSMUSG00000038765	LIM Homeobox Transcription Factor 1	2001	LMX1B		9	Lmx1b	2	AD	Transcription	Mouse Model
ENSG00000196365	ENSMUSG00000041168	Lon Protease 1, Mitochondrial	2015	LONP1		19	Lonp1	17	AR	Enzyme	Mouse
ENSG00000101577	ENSMUSG00000024052	Lipin 2	2010	LPIN2		18	Lpin2	17	AR	Enzyme	No Mouse Data
ENSG00000134569	ENSMUSG00000027253	LDL Receptor Related Protein 4	2010	LRP4		11	Lrp4	2	AR	Signaling	Mouse Model
ENSG00000162337	ENSMUSG00000024913	LDL Receptor Related Protein 5	2001	LRP5		11	Lrp5	19	AD/AR	Signaling	Mouse Model
ENSG00000154237	ENSMUSG00000015133	Leucine Rich Repeat Kinase 1	2019	LRRK1		15	Lrrk1	7	AR	Enzyme	Mouse Model
ENSG00000119681	ENSMUSG00000002020	Latent TGF Beta Binding Protein 2	2015	LTBP2		14	Ltbp2	12	AR	Signaling	Mouse
ENSG00000168056	ENSMUSG00000024940	Latent Transforming Growth Factor Beta Binding Protein 3	2019	LTBP3		11	Ltbp3	19	AD/AR	Signaling	Mouse Model
ENSG00000113648	ENSMUSG00000015937	MacroH2A.1 Histone	2019	MACROH2A1	H2AFY	5	Macroh2a1	13	AD	Transcription	Mouse Model
ENSG00000204103	ENSMUSG00000074622	MAF bZIP Transcription Factor B	2015	MAFB		20	Mafb	2	AD	Transcription	Mouse
ENSG00000104774	ENSMUSG00000005142	Mannosidase Alpha Class 2B Member 1	2010	MAN2B1	MANB	19	Man2b1	8	AR	Enzyme	No Mouse Data
ENSG00000109323	ENSMUSG00000028164	Mannosidase Beta	2019	MANBA		4	Manba	3	AR	Enzyme	Model Failure
ENSG00000169032	ENSMUSG00000004936	Mitogen-Activated Protein Kinase Kinase 1	2019	MAP2K1		15	Map2k1	9	SP	Enzyme	Mouse
ENSG00000091436	ENSMUSG00000004085	Mitogen-Activated Protein Kinase Kinase Kinase 20	2019	MAP3K20	ZAK	2	Map3k20	2	AR	Enzyme	Mouse Model
ENSG00000135341	ENSMUSG00000028284	Mitogen-Activated Protein Kinase Kinase Kinase 7	2019	MAP3K7	TAK1	6	Map3k7	4	AD	Enzyme	Mouse Model
ENSG00000132031	ENSMUSG00000020583	Matrilin 3	2001	MATN3		2	Matn3	12	AD/AR	Matrix	Mouse Model
ENSG00000012174	ENSMUSG00000046873	Membrane Bound Transcription Factor Peptidase, Site 2	2019	MBTPS2		X	Mbtps2	X	XLR	Enzyme	No Mouse Data
ENSG00000085276	ENSMUSG00000027684	MDS1 and EVI1 Complex Locus	2019	MECOM		3	Mecom (Evi1)	3	AD	Transcription	No Mouse Data
ENSG00000105429	ENSMUSG00000045039	Multiple EGF Like Domains 8	2015	MEGF8		19	Megf8	7	AR	Scaffolding	Mouse Model
ENSG00000005102	ENSMUSG00000001493	Mesenchyme Homeobox 1	2015	MEOX1		17	Meox1	11	AR	Transcription	Mouse Model
ENSG00000188095	ENSMUSG00000030543	Mesoderm Posterior	2006	MESP2		15	Mesp2	7	AD/AR	Transcription	Mouse Model
ENSG00000105976	ENSMUSG00000009376	MET Proto-Oncogene, Receptor Tyrosine Kinase	2019	MET		7	Met	6	AD, SP	Signaling	Mouse
ENSG00000111341	ENSMUSG00000030218	Matrix Gla Protein	2001	MGP		12	Mgp	6	AR	Matrix	Mouse Model
ENSG00000208017	ENSMUSG00000065439	MicroRNA 140	2019	MIR140		16	Mir140	8	AD	MicroRNA	Mouse Model
ENSG00000011143	ENSMUSG00000034121	Meckel Syndrome, Type 1	2010	MKS1		17	Mks1	11	AR	Ciliopathy	Mouse Model
ENSG00000087245	ENSMUSG00000031740	Matrix Metalloprotease 2	2001	MMP2		16	Mmp2	8	AR	Enzyme	Mouse Model
ENSG00000100985	ENSMUSG00000017737	Matrix Metalloprotease 9	2010	MMP9		20	Mmp9	2	AR	Enzyme	Mouse Model
ENSG00000137745	ENSMUSG00000050578	Matrix Metalloprotease 13	2006	MMP13		11	Mmp13	9	AD/AR	Enzyme	Mouse Model
ENSG00000157227	ENSMUSG00000000957	Matix Metalloproteinase 14	2019	MMP14		14	Mmp14	14	AR	Enzyme	Mouse Model
ENSG00000130675	ENSMUSG00000001566	Homeobox Gene HB9	2006	MNX1	HLXB9	7	Mnx1	5	AD	Transcription	Model Failure
ENSG00000120149	ENSMUSG00000021469	Msh Homeobox 2	2001	MSX2		5	Msx2	13	AD	Transcription	Mouse Model
ENSG00000099810	ENSMUSG00000062937	Methylthioadenosine Phosphorylase	2019	MTAP		9	Mtap	4	AD	Enzyme	No Mouse Data
ENSG00000134323	ENSMUSG00000037169	MYCN Proto-Oncogene, bHLH Transcription Factor	2006	MYCN		2	Mycn	12	AD	Transcription	Mouse Model
ENSG00000109063	ENSMUSG00000020908	Myosin Heavy Chain 3	2019	MYH3		17	Myh3	11	AD/AR	Scaffolding	No Mouse Data
ENSG00000133454	ENSMUSG00000072720	Myosin XVIIIB	2019	MYO18B		22	Myo18b	5	AR	Scaffolding	No Mouse Data
ENSG00000108784	ENSMUSG00000001751	N-Acetyl-Beta-D-Glucosaminidase	2006	NAGLU		17	Naglu	11	AR	Enzyme	Mouse
ENSG00000095380	ENSMUSG00000028334	N-Acetylneuraminate Synthase	2019	NANS		12	Nans	4	AR	Enzyme	No Mouse Data
ENSG00000151779	ENSMUSG00000020576	NBAS Subunit of NRZ Tethering Complex	2019	NBAS		2	Nbas	12	AR	Scaffolding	No Mouse Data
ENSG00000137601	ENSMUSG00000031644	NIMA (Never in Mitosis Gene A)-Related Expressed Kinase 1	2010	NEK1		4	Nek1	8	AR	Enzyme	Mouse Model
ENSG00000204386	ENSMUSG00000007038	Neuraminidase 1	2006	NEU1		6	Neu1	17	AR	Enzyme	Mouse
ENSG00000196712	ENSMUSG00000020716	Neurofibromin	2010	NF1		17	Nf1	11	AD	Scaffolding	Mouse Model
ENSG00000008441	ENSMUSG00000001911	Nuclear Factor 1	2010	NFIX		19	Nfix	8	AD	Transcription	Mouse
ENSG00000164190	ENSMUSG00000022141	NIPBL, Cohesin Loading Factor	2006	NIPBL		5	Nipbl	15	AD	Cohesionopathy	Mouse Model
ENSG00000109705	ENSMUSG00000049691	NK3 Homeobox 2	2010	NKX3-2		4	Nkx-3	5	AR	Transcription	Mouse Model
ENSG00000162711	ENSMUSG00000032691	NLR Family, Pyrin Domain Containing 3	2006	NLRP3	CIAS1	1	Nlrp3	11	AD	Scaffolding	Mouse Model
ENSG00000183691	ENSMUSG00000048616	Noggin	2001	NOG		17	Nog	11	AD	Signaling	Mouse Model
ENSG00000134250	ENSMUSG00000027878	Notch 2	2015	NOTCH2		1	Notch2	3	AD	Signaling	Mouse Model
ENSG00000163273	ENSMUSG00000026241	Natriuretic Peptide C	2010	NPPC		2	Nppc	1	SP	Signaling	Mouse Model
ENSG00000159899	ENSMUSG00000028469	Natriuretic Peptide Receptor 2	2006	NPR2		9	Nor2	4	AR	Signaling	Mouse Model
ENSG00000113389	ENSMUSG00000022206	Natriuretic Peptide Receptor 3	2019	NPR3		5	Npr3	15	AR	Signaling	Mouse Model
ENSG00000213281	ENSMUSG00000027852	NRAS Proto-Oncogene, GTPase	2019	NRAS		1	Nras	3	SP	Enzyme	Mouse
ENSG00000165671	ENSMUSG00000021488	Nuclear Receptor Binding SET Domain Protein 1	2010	NSD1		5	Nsd1	13	AD	Transcription	Model Failure
ENSG00000147383	ENSMUSG00000031349	NAD(P)H Steroid Dehydrogenase-Like Protein	2006	NSDHL		X	Nsdhl	X	X	Enzyme	Mouse Model
ENSG00000156831	ENSMUSG00000059586	NSE2 (MMS21) Homolog, SMC5-SMC6 Complex SUMO	2019	NSMCE2		8	Nsmce2	15	AR	Enzyme	Mouse
ENSG00000167693	ENSMUSG00000020844	Nucleoredoxin	2019	NXN		17	Nxn	11	AR	Enzyme	Mouse Model
ENSG00000124006	ENSMUSG00000026211	Obscurin-Like 1	2010	OBSL1		2	Obsl1	1	AR	Scaffolding	No Mouse Data
ENSG00000046651	ENSMUSG00000040586	OFD1, Centriole and Centriolar Satellite Protein	2006	OFD1		X	Ofd1	X	X	Ciliopathy	Mouse Model
ENSG00000085840	ENSMUSG00000028587	Origin Recognition Complex, Subunit 1	2015	ORC1		1	Orc1	4	AR	Scaffolding	No Mouse Data
ENSG00000115947	ENSMUSG00000026761	Origin Recognition Complex, Subunit 4	2015	ORC4		2	Orc4	2	AR	Scaffolding	No Mouse Data
ENSG00000091651	ENSMUSG00000031697	Origin Recognition Complex, Subunit 6	2015	ORC6		16	Orc6	8	AR	Scaffolding	No Mouse Data
ENSG00000081087	ENSMUSG00000038280	Osteopetrosis Associated Transmembrane Protein 1	2006	OSTM1		6	Ostm1	10	AR	Scaffolding	Mouse Model
ENSG00000117385	ENSMUSG00000028641	Prolyl-3-Hydroxylase	2006	P3H1	LEPRE1	1	P3h1	4	AD	Enzyme	Mouse Model
ENSG00000185624	ENSMUSG00000025130	Prolyl 4-Hydroxylase, Beta-Subunit	2015	P4HB		17	P4hb	11	AD	Enzyme	No Mouse Data
ENSG00000217930	ENSMUSG00000014301	Presequence Translocase-Asssociated Motor 16	2015	PAM16	MAGMAS	16	Pam16	16	AR	Scaffolding	No Mouse Data
ENSG00000198682	ENSMUSG00000024899	3'-Phosphoadenosine 5'-Phosphosulfate Synthase 2	2001	PAPSS2		10	Papss2	19	AR	Enzyme	Mouse Model
ENSG00000135903	ENSMUSG00000004872	Paired Box 3	2019	PAX3		2	Pax3	1	AD	Transcription	Mouse Model
ENSG00000160299	ENSMUSG00000001151	Pericentrin 2	2010	PCNT	PCNT2	21	Pcnt	10	AR	Scaffolding	Mouse
ENSG00000161217	ENSMUSG00000005615	Phosphate Cytidylyltransferase 1	2015	PCYT1A		3	Pcyt1a	16	AR	Enzyme	Mouse
ENSG00000172572	ENSMUSG00000041741	Phosphodiesterase 3A	2015	PDE3A		12	Pde3a	6	AD	Enzyme	Mouse
ENSG00000113448	ENSMUSG00000021699	Phosphodiesterase 4D, Camp-Specific	2015	PDE4D		5	Pde4d	13	AD	Enzyme	Mouse Model
ENSG00000139197	ENSMUSG00000005069	Peroxisomal Biogenesis Factor 5	2019	PEX5		12	Pex5	6	AR	Signaling	Mouse
ENSG00000112357	ENSMUSG00000020003	Peroxisomal PTS2 Receptor	2001	PEX7		6	Pex7	10	AR	Signaling	Mouse Model
ENSG00000102174	ENSMUSG00000057457	Phosphate Regulating Endopeptidase Homolog X-Linked	2001	PHEX		X	Phex	X	X	Enzyme	Mouse Model
ENSG00000060642	ENSMUSG00000043257	Phosphatidylinositol Glycan Anchor Biosynthesis Class V	2010	PIGV		1	Pigv	4	AR	Enzyme	No Mouse Data
ENSG00000121879	ENSMUSG00000027665	Phosphatidylinositol 3-Kinase, Catalytic, Alpha	2015	PIK3CA		3	Pik3ca	3	SP	Enzyme	Mouse
ENSG00000241878	ENSMUSG00000095041	Phosphatidylserine Decarboxylase	2019	PISD		22	Pisd	5	AR	Enzyme	No Mouse Data
ENSG00000069011	ENSMUSG00000021506	Paired-Like Homeodomain Transcription Factor 1	2010	PITX1		5	Pitx1	13	AD	Transcription	Mouse Model
ENSG00000149782	ENSMUSG00000024960	Phospholipase C Beta 3	2019	PLCB3		11	Plcb3	19	AR	Enzyme	Mouse
ENSG00000101333	ENSMUSG00000039943	Phospholipase C Beta 4	2019	PLCB4		20	Plcb4	2	AD/AR	Enzyme	Mouse
ENSG00000225190	ENSMUSG00000034247	Pleckstrin Homology and RUN Domain Containing M1	2010	PLEKHM1		17	Plekhm1	11	AR	Scaffolding	Mouse Model
ENSG00000083444	ENSMUSG00000019055	Procollagen-Lysine,2-Oxoglutarate 5-Dioxygenase 1	2019	PLOD1		1	Plod1	4	AR	Enzyme	Mouse Model
ENSG00000152952	ENSMUSG00000032374	Procollagen Lysyl Hydroxylase	2006	PLOD2		3	Plod2	9	AR	Enzyme	No Mouse Data
ENSG00000102024	ENSMUSG00000016382	Plastrin 3	2015	PLS3		X	Pls3	X	X	Scaffolding	Mouse Model
ENSG00000177084	ENSMUSG00000007080	DNA Polymerase Epsilon, Catalytic Subunit	2019	POLE		12	Pole	5	AR	Enzyme	No Mouse Data
ENSG00000068654	ENSMUSG00000049553	RNA Polymerase I Subunit A	2019	POLR1A		2	Polr1a	6	AD	Ciliopathy	No Mouse Data
ENSG00000171453	ENSMUSG00000067148	RNA Polymerase I Subunit C	2010	POLR1C		6	Polr1c	17	AR	Enzyme	No Mouse Data
ENSG00000186184	ENSMUSG00000029642	RNA Polymerase I Subunit D	2010	POLR1D		13	Polr1d	5	AD/AR	Enzyme	No Mouse Data
ENSG00000148606	ENSMUSG00000025280	RNA Polymerase III Subunit A	2019	POLR3A		10	Polr3a	14	AR	Enzyme	Mouse
ENSG00000013503	ENSMUSG00000034453	RNA Polymerase III Subunit B	2019	POLR3B		12	Polr3b	10	AR	Enzyme	No Mouse Data
ENSG00000104356	ENSMUSG00000022325	POP1 Homolog, Ribonuclease P/MRP Subunit	2015	POP1		8	Pop1	15	AR	Enzyme	Mouse
ENSG00000127948	ENSMUSG00000005514	Cytochrome P450 Oxidoreductase	2006	POR		7	Por	5	AR	Enzyme	Mouse Model
ENSG00000166794	ENSMUSG00000032383	Peptidylprolyl Isomerase B	2010	PPIB		15	Ppib	9	AR	Enzyme	Mouse Model
ENSG00000108946	ENSMUSG00000020612	Protein Kinase, cAMP Dependent Regulatory, Type I, Alpha	2015	PRKAR1A		17	Prkar1a	11	AD	Enzyme	Mouse Model
ENSG00000156471	ENSMUSG00000021518	Phosphatidylserine Synthase 1	2015	PTDSS1		8	Ptdss1	13	AD	Enzyme	Mouse
ENSG00000160801	ENSMUSG00000032492	Parathyroid Hormone 1 Receptor	2001	PTH1R		3	Pth1r	9	AD/AR	Signaling	Mouse Model
ENSG00000087494	ENSMUSG00000048776	Parathyroid Hormone Like Hormone	2010	PTHLH		12	Pthlh	6	AD	Signaling	Mouse Model
ENSG00000179295	ENSMUSG00000043733	Protein-Tyrosine Phosphatase Nonreceptor-Type 11	2010	PTPN11		12	Ptpn11	5	AD	Enzyme	Mouse Model
ENSG00000183010	ENSMUSG00000025140	Pyrroline-5-Carboxylate Reductase 1	2010	PYCR1		17	Pycr1	11	AR	Enzyme	No Mouse Data
ENSG00000112210	ENSMUSG00000004768	RAB23, Member RAS Oncogene Family, GTPase	2010	RAB23		6	Rab23	1	AR	Enzyme	Mouse
ENSG00000172007	ENSMUSG00000027739	RAS-Associated Protein rab33b	2015	RAB33B		4	Rab33b	3	AR	Enzyme	No Mouse Data
ENSG00000164754	ENSMUSG00000022314	RAD21 Cohesin Complex Component	2015	RAD21		8	Rad21	15	AD	Cohesionopathy	Mouse
ENSG00000068831	ENSMUSG00000032946	RAS Guanyl Releasing Protein 2	2010	RASGRP2		11	Rasgrp2	19	AR	Scaffolding	Mouse
ENSG00000101773	ENSMUSG00000041238	RB Binding Protein 8, Endonuclease	2019	RBBP8		18	Rbbp8	18	AR	Enzyme	No Mouse Data
ENSG00000131795	ENSMUSG00000038374	RNA Binding Motif Protein 8a	2015	RBM8A		1	Rbm8a	3	AR	Transcription	Mouse
ENSG00000168214	ENSMUSG00000039191	Recombination Signal Binding Protein for Immunoglobulin Kappa J	2015	RBPJ		4	Rbpj	5	AD	Transcription	Mouse
ENSG00000160957	ENSMUSG00000033762	RecQ Like Helicase 4	2006	RECQL4		8	Recql4	15	AR	Enzyme	Mouse Model
ENSG00000203877	ENSMUSG00000047897	Ripply Transcriptional Repressor 2	2019	RIPPLY2		6	Ripply2	9	AR	Transcription	Mouse Model
ENSG00000269900	ENSMUSG00000088088	RNA Component of Mitochondrial RNAase P	2001	RMRP		9	Rmrp	4	AR	Enzyme	No Mouse Data
ENSG00000264229	ENSMUSG00000080542	RNA, U4atac small nuclear (U12-dependent splicing)	2015	RNU4ATAC		2	No Mouse Gene		AR	Transcription	No Mouse Gene
ENSG00000169071	ENSMUSG00000021464	Receptor Tyrosine Kinase Like Orphan Receptor 2	2001	ROR2		9	Ror2	13	AD/AR	Signaling	Mouse Model
ENSG00000103494	ENSMUSG00000033282	RPGRIP1 Like	2010	RPGRIP1L		16	Rpgrip1l	8	AR	Ciliopathy	Mouse
ENSG00000147655	ENSMUSG00000051920	R-Spondin 2	2019	RSPO2		8	Rspo2	15	AR	Signaling	Mouse Model
ENSG00000159579	ENSMUSG00000050079	Ring Finger and SPRY Domain Containing	2019	RSPRY1		18	Rspry1	8	AR	Signaling	No Mouse Data
ENSG00000124813	ENSMUSG00000039153	Runt Related Transcription Factor 2	2001	RUNX2		6	Runx2	17	AD	Transcription	Mouse Model
ENSG00000103449	ENSMUSG00000031665	SAL-Like 1	2006	SALL1		16	Sall1	8	AD	Transcription	Mouse Model
ENSG00000101115	ENSMUSG00000027547	SAL-Like 4	2006	SALL4		20	Sall4	2	AD	Transcription	Mouse Model
ENSG00000126524	ENSMUSG00000025337	SBDS, Ribosome Maturation Factor	2006	SBDS		7	Sbds	5	AR	Scaffolding	Mouse Model
ENSG00000169439	ENSMUSG00000022261	Syndecan 2	2019	SDC2		8	Sdc2	15	AD	Scaffolding	Mouse
ENSG00000150961	ENSMUSG00000039234	SEC24 Homolog D, COPII Coat Complex Component	2015	SEC24D		4	Sec24d	3	AR	Scaffolding	Mouse
ENSG00000132386	ENSMUSG00000000753	Serpin Family F Member 1	2015	SERPINF1		17	Serpinf1	11	AR	Scaffolding	Mouse Model
ENSG00000149257	ENSMUSG00000070436	Serpin Family H Member 1	2010	SERPINH1	HSP47	11	Serpinh1	7	AR	Scaffolding	Mouse Model
ENSG00000181555	ENSMUSG00000044791	SET Domain Containing 2	2015	SETD2		3	Setd2	9	AD	Enzyme	Mouse
ENSG00000143368	ENSMUSG00000068856	Splicing Factor 3b, Subunit 4	2015	SF3B4		1	Sf3b4	3	AD/AR	Scaffolding	No Mouse Data
ENSG00000106483	ENSMUSG00000021319	Secreted Frizzled Related Protein 4	2019	SFRP4		7	Sfrp4	13	AR	Signaling	Mouse Model
ENSG00000164023	ENSMUSG00000050931	Sphingomyelin Synthase 2	2019	SGMS2		4	Sgms2	3	AD	Enzyme	Mouse
ENSG00000181523	ENSMUSG00000005043	Heparan Sulfate Sulfatase	2006	SGSH	HSS	17	Sgsh	11	AR	Enzyme	Mouse Model
ENSG00000087266	ENSMUSG00000054520	SH3 Domain Binding Protein 2	2001	SH3BP2		4	Sh3bp2	5	AD	Scaffolding	Mouse Model
ENSG00000174705	ENSMUSG00000040711	SH3 and PX Domains 2B	2010	SH3PXD2B		5	Sh3pxd2b	11	AR	Scaffolding	Mouse Model
ENSG00000164690	ENSMUSG00000002633	Sonic Hedgehog Signaling Molecule	2006	SHH		7	Shh	5	AD/AR	Enzyme	Mouse Model
ENSG00000185960	ENSMUSG00000053909	Short Stature Homeobox	2001	SHOX		X	Shox2 (Paralog)	3	X	Transcription	Mouse Model
ENSG00000157933	ENSMUSG00000029050	SKI Proto-Oncogene	2015	SKI		1	Ski	4	AD	Transcription	Mouse Model
ENSG00000120519	ENSMUSG00000031684	Solute Carrier Family 10 Member 7	2019	SLC10A7		4	Slc10a7	8	AR	Transporter	Mouse Model
ENSG00000119899	ENSMUSG00000049624	Sialin	2006	SLC17A5		6	Slc17a5	9	AR	Transporter	Mouse
ENSG00000155850	ENSMUSG00000034320	Sulfate Transporter	2001	SLC26A2	DTDST	5	Slc26a2	18	AR	Transporter	Mouse Model
ENSG00000198246	ENSMUSG00000020100	Nuceloside Transporter	2015	SLC29A3		10	Slc29a3	10	AR	Transporter	Mouse
ENSG00000198569	ENSMUSG00000006469	Sodium - Phosphate Transporter	2010	SLC34A3		9	Slc34a3	2	AR	Transporter	Mouse Model
ENSG00000116704	ENSMUSG00000028521	Nucleoside-Sugar Transporter	2010	SLC35D1		1	Slc35d1	4	AR	Transporter	Mouse Model
ENSG00000165915	ENSMUSG00000002105	Zinc Transporter	2010	SLC39A13		11	Slc39a13	2	AR	Transporter	Mouse Model
ENSG00000174640	ENSMUSG00000032548	SLC Organic Anion Transporter Family, Member 2A1	2019	SLCO2A1		3	Slco2a1	9	AD	Transporter	Mouse
ENSG00000137571	ENSMUSG00000025938	Solute Carrier Organic Anion Transporter Family Member 5A1	2010	SLCO5A1		8	Slco5a1	1	AD/AR	Transporter	No Mouse Data
ENSG00000175387	ENSMUSG00000024563	SMAD Family Member 2	2019	SMAD2		18	Smad2	18	AD	Transcription	No Mouse Data
ENSG00000166949	ENSMUSG00000032402	SMAD Family Member 3	2015	SMAD3		15	Smad3	9	AD	Transcription	Mouse Model
ENSG00000141646	ENSMUSG00000024515	SMAD Family Member 4	2015	SMAD4		18	Smad4	18	AD	Transcription	Mouse Model
ENSG00000127616	ENSMUSG00000032187	SWI/SNF Related, Matrix Associated, Actin Dependent Regulator of Chromatin, Subfamily A, Member 4	2019	SMARCA4	BRG1	19	Smarca4	9	AD	Enzyme	Mouse
ENSG00000138375	ENSMUSG00000039354	SWI/SNF Related, Matrix Associated, Actin Dependent Regulator of Chromatin, Subfamily A Like 1	2006	SMARCAL1		2	Smarcal1	1	AR	Enzyme	Model Failure
ENSG00000099956	ENSMUSG00000000902	SWI/SNF Related, Matrix Associated, Actin Dependent Regulator of Chromatin, Subfamily B, Member 1	2019	SMARCB1		22	Smarcb1	10	AD	Enzyme	Mouse
ENSG00000073584	ENSMUSG00000037935	SWI/SNF Related, Matrix Associated, Actin Dependent Regulator of Chromatin, Subfamily C, Member 41	2019	SMARCE1		17	Smarce1	11	AD	Enzyme	No Mouse Data
ENSG00000072501	ENSMUSG00000041133	Structural Maintenance of Chromosomes 1A	2015	SMC1A		X	Smc1a	X	X	Cohesionopathy	No Mouse Data
ENSG00000108055	ENSMUSG00000024974	Structural Maintenance of Chromosomes 3	2015	SMC3		10	Smc3	19	AD	Cohesionopathy	Mouse Model
ENSG00000125835	ENSMUSG00000027404	Small Nuclear Ribonucleoprotein B	2015	SNRPB		20	Snrpb	2	AD	Transcription	No Mouse Data
ENSG00000086300	ENSMUSG00000038301	Sorting Nexin 10	2015	SNX10		7	Snx10	6	AD/AR	Scaffolding	Mouse Model
ENSG00000167941	ENSMUSG00000001494	Sclerostin	2001	SOST		17	Sost	11	AD/AR	Signaling	Mouse Model
ENSG00000125398	ENSMUSG00000000567	SRY-Box 9	2001	SOX9		17	Sox9	11	AD	Transcription	Mouse Model
ENSG00000170374	ENSMUSG00000060284	Sp7 Transcription Factor	2010	SP7	Osterix	12	Sp7	15	AR	Transcription	Mouse Model
ENSG00000113140	ENSMUSG00000018593	Secreted Protein Acidic and Cysteine Rich	2019	SPARC		5	Sparc	11	AR	Matrix	Mouse Model
ENSG00000100883	ENSMUSG00000073079	Signal Recognition Particle 54	2019	SRP54		14	Srp54a	12	AD	Enzyme	No Mouse Data
ENSG00000137573	ENSMUSG00000016918	Sulfatase 1	2010	SULF1		8	Sulf1	1	AD	Enzyme	Mouse Model
ENSG00000144455	ENSMUSG00000030101	Sulfatase Modifying Factor 1	2006	SUMF1		3	Sumf1	6	AR	Enzyme	Mouse Model
ENSG00000178691	ENSMUSG00000017548	SUZ12 Polycomb Repressive Complex 2 Subunit	2019	SUZ12		17	Suz12	11	AD	Transcription	Mouse
ENSG00000055208	ENSMUSG00000015755	TGF-Beta Activated Kinase 1 (MAP3K7) Binding Protein 2	2019	TAB2		6	Tab2	10	AD	Scaffolding	No Mouse Data
ENSG00000116957	ENSMUSG00000039233	Tubulin-Specific Chaperone E	2006	TBCE		1	Tbce	13	AR	Scaffolding	Mouse
ENSG00000092607	ENSMUSG00000027868	T-Box 15	2015	TBX15		1	Tbx15	3	AR	Transcription	Mouse Model
ENSG00000135111	ENSMUSG00000018604	T-Box 3	2001	TBX3		12	Tbx3	5	AD	Transcription	Mouse Model
ENSG00000121075	ENSMUSG00000000094	T-Box 4	2006	TBX4		17	Tbx4	11	AD	Transcription	Mouse Model
ENSG00000089225	ENSMUSG00000018263	T-Box 5	2001	TBX5		12	Tbx5	5	AR	Transcription	Mouse Model
ENSG00000149922	ENSMUSG00000030699	T-Box 6	2015	TBX6		16	Tbx6	7	AD	Transcription	Mouse Model
ENSG00000059377	ENSMUSG00000029925	Thromboxane A Synthase 1	2010	TBXAS1		7	Tbxas1	6	AR	Enzyme	Mouse
ENSG00000140262	ENSMUSG00000032228	Transcription Factor 12	2015	TCF12		15	Tcf12	9	AD	Transcription	Mouse Model
ENSG00000110719	ENSMUSG00000001750	T-cell Immune Regulator 1, ATPase H+ Transporting V0 Subunit A3	2001	TCIRG1		11	Tcirg1	19	AR	Transporter	Mouse Model
ENSG00000070814	ENSMUSG00000024613	Treacle Ribosome Biogenesis Factor 1	2006	TCOF1		5	Tcof1	18	AD	Transcription	Mouse Model
ENSG00000213123	ENSMUSG00000014075	Tctex1 Domain Containing 2	2019	TCTEX1D2		3	Tctex1d2	16	AR	Ciliopathy	No Mouse Data
ENSG00000119977	ENSMUSG00000025008	Tectonic Family Member 3	2015	TCTN3		10	Tctn3	19	AR	Ciliopathy	Mouse Model
ENSG00000112773	ENSMUSG00000032265	Terminal Nucleotidyltransferase 5A	2019	TENT5A	FAM46A	3	Tent5a	1	AR	Enzyme	Mouse Model
ENSG00000088451	ENSMUSG00000022130	TDP-Glucose 4,6 Dehydratase	2015	TGDS		13	Tgds	14	AR	Enzyme	Mouse Model
ENSG00000105329	ENSMUSG00000002603	Transforming Growth Factor Beta 1	2001	TGFB1		19	Tgfb1	7	AD	Signaling	Mouse Model
ENSG00000092969	ENSMUSG00000039239	Transforming Growth Factor Beta 2	2015	TGFB2		1	Tgfb2	1	AD	Signaling	Mouse Model
ENSG00000119699	ENSMUSG00000021253	Transforming Growth Factor Beta 3	2019	TGFB3		14	Tgfb3	12	AD	Signaling	Mouse
ENSG00000106799	ENSMUSG00000007613	Transforming Growth Factor Beta Receptor 1	2010	TGFBR1		9	Tgfbr1	4	AD	Signaling	Mouse
ENSG00000163513	ENSMUSG00000032440	Transforming Growth Factor Beta Receptor 2	2010	TGFBR2		3	Tgfbr2	9	AD	Signaling	Mouse Model
ENSG00000090534	ENSMUSG00000022847	Thrombopoietin	2010	THPO		3	Thpo	16	AD	Signaling	No Mouse Data
ENSG00000134851	ENSMUSG00000029234	Transmembrane Protein 165	2019	TMEM165		4	Tmem165	5	AR	Scaffolding	Mouse
ENSG00000187049	ENSMUSG00000024667	Transmembrane Protein 216	2015	TMEM216		11	Tmem216	19	AR	Ciliopathy	No Mouse Data
ENSG00000095209	ENSMUSG00000028420	Transmembrane Protein 38B	2015	TMEM38B	TRIC-B	9	Tmem38b	4	AR	Transporter	Mouse Model
ENSG00000164953	ENSMUSG00000049488	Transmembrane Protein 67	2010	TMEM67		8	Tmem67	4	AR	Ciliopathy	Mouse
ENSG00000141655	ENSMUSG00000026321	TNF Receptor Superfamily Member 11A	2001	TNFRSF11A	RANK	18	Tnfrsf11a	1	AD/AR	Signaling	Mouse Model
ENSG00000164761	ENSMUSG00000063727	Tumor Necrosis Factor Receptor Superfamily, Member 11B	2006	TNFRSF11B	OPG	8	Tnfrsf11b	15	AR	Signaling	Mouse Model
ENSG00000120659	ENSMUSG00000022015	TNF Superfamily Member 11	2010	TNFSF11	RANKL	13	Tnfsf11	14	AR	Signaling	Mouse Model
ENSG00000160949	ENSMUSG00000059323	Tonsoku Like, DNA Repair Protein	2019	TONSL		8	Tonsl	15	AR	Transcription	No Mouse Data
ENSG00000073282	ENSMUSG00000022510	Tumor Protein P63	2001	TP63		3	Trp63	16	AD	Transcription	Mouse Model
ENSG00000204104	ENSMUSG00000034292	TRAF3 Interacting Protein 1	2019	TRAF3IP1		2	Traf3ip1	1	AR	Ciliopathy	Mouse Model
ENSG00000183763	ENSMUSG00000032586	TRAF Interacting Protein	2019	TRAIP		3	Traip	9	AR	Enzyme	No Mouse Data
ENSG00000196459	ENSMUSG00000007777	Trafficking Protein Particle Complex 2	2001	TRAPPC2	SEDL	X	Trappc2	X	X	Scaffolding	No Mouse Data
ENSG00000095970	ENSMUSG00000023992	Triggering Receptor Expressed on Myeloid Cells 2	2010	TREM2		6	Trem2	17	AR	Signaling	Mouse Model
ENSG00000100815	ENSMUSG00000021188	Thyroid Hormone Receptor Interactor 11	2010	TRIP11		14	Trip11	12	AR	Scaffolding	Mouse Model
ENSG00000104447	ENSMUSG00000038679	Transcriptional Repressor GATA Binding 1	2001	TRPS1		6	Trps1	15	AD	Transcription	Mouse Model
ENSG00000111199	ENSMUSG00000014158	Transient Receptor Potential Cation Channel Subfamily V Member 4	2010	TRPV4		12	Trpv4	5	AD	Transporter	Mouse Model
ENSG00000165125	ENSMUSG00000029868	Transient Receptor Potential Cation Channel Subfamily V Member 6	2019	TRPV6		7	Trpv6	6	AR	Signaling	Mouse Model
ENSG00000123607	ENSMUSG00000034848	Tetratricopeptide Repeat Domain-Containing Protein 21B	2015	TTC21B	IFT139	2	Ttc21b	2	AR	Ciliopathy	Mouse Model
ENSG00000122691	ENSMUSG00000035799	Twist Family bHLH Transcription Factor 1	2001	TWIST1		7	Twist1	12	AD/AR	Transcription	Mouse Model
ENSG00000011600	ENSMUSG00000030579	TYRO Protein Tyrosine Kinase Binding Protein	2010	TYROBP	DAP12	19	Tyrobp	7	AR	Signaling	Mouse Model
ENSG00000109775	ENSMUSG00000031634	UFM1 Specific Peptidase 2	2019	UFSP2		4	Ufsp2	8	AD	Enzyme	No Mouse Data
ENSG00000103043	ENSMUSG00000010936	VAC14 Component of PIKFYVE Complex	2019	VAC14		16	Vac14	8	AR	Scaffolding	Mouse
ENSG00000173218	ENSMUSG00000027860	VANGL Planar Cell Polarity Protein 1	2019	VANGL1	STB2	1	Vangl1	3	AD	Signaling	Mouse
ENSG00000111424	ENSMUSG00000022479	Vitamin D Receptor	2001	VDR		12	Vdr	15	AR	Signaling	Mouse Model
ENSG00000139719	ENSMUSG00000029434	VPS33A Core Subunit of CORVET and HOPS Complexes	2019	VPS33A		12	Vps33a	5	AR	Scaffolding	Mouse
ENSG00000157796	ENSMUSG00000037890	WD Repeat-Containing Protein 19	2015	WDR19		4	Wdr19	5	AR	Ciliopathy	Mouse Model
ENSG00000119333	ENSMUSG00000039715	WD Repeat-Containing Protein 34	2015	WDR34		9	Wdr34	2	AR	Ciliopathy	Mouse Model
ENSG00000118965	ENSMUSG00000066643	WD Repeat-Containing Protein 35	2010	WDR35		2	Wdr35	12	AR	Ciliopathy	Mouse Model
ENSG00000126870	ENSMUSG00000042050	WD Repeat Domain 60	2019	WDR60		7	Wdr60	12	AR	Ciliopathy	No Mouse Data
ENSG00000125084	ENSMUSG00000022997	Wnt Family Member 1	2015	WNT1		12	Wnt1	15	AD	Signaling	Mouse Model
ENSG00000108379	ENSMUSG00000000125	Wnt Family Member 3	2006	WNT3		17	Wnt3	11	AR	Signaling	Mouse Model
ENSG00000114251	ENSMUSG00000021994	Wnt Family Member 5A	2015	WNT5A		3	Wnt5a	14	AD	Signaling	Mouse Model
ENSG00000115596	ENSMUSG00000033227	Wnt Family Member 6	2015	WNT6		2	Wnt6	1	AD	Signaling	No Mouse Data
ENSG00000154764	ENSMUSG00000030093	Wnt Family Member 7A	2010	WNT7A		3	Wnt7a	6	AR	Signaling	Mouse Model
ENSG00000169884	ENSMUSG00000022996	Wnt Family Member 10B	2015	WNT10B		12	Wnt10b	15	AD/AR	Signaling	Mouse Model
ENSG00000152422	ENSMUSG00000021615	X-Ray Repair Cross Complementing 4	2019	XRCC4		5	Xrcc4	13	AR	Scaffolding	Mouse
ENSG00000103489	ENSMUSG00000030657	Xylosyltransferase I	2015	XYLT1		16	Xylt1	7	AR	Enzyme	Mouse Model
ENSG00000015532	ENSMUSG00000020868	Xylosyltransferase II	2015	XYLT2		17	Xylt2	11	AR	Enzyme	Mouse
ENSG00000084073	ENSMUSG00000043207	Zinc Metalloprotease	2006	ZMPSTE24		1	Zmpste24	4	AR	Enzyme	Mouse Model
ENSG00000130449	ENSMUSG00000032846	Zinc Finger SWIM-Type Containing 6	2019	ZSWIM6		5	Zswim6	13	AD	Scaffolding	Mouse
